# Supplementary material for: High-precision measurement of Cd isotopes in ultra-trace Cd samples using double spike-standard addition MC-ICP-MS
Source: Royal Society of Chemistry journal article supplement (doi:10.1039/d3ja00047h), 2023-01-01
Supplement: d3ja00047h1.pdf [file d3ja00047h1.pdf]

## Supplementary information

# High-precision measurement of Cd isotopes in ultra-trace Cd samples using double spike-standard addition MC-ICP-MS

Hui Chang<sup>†</sup>, Jian-Ming Zhu<sup>\*†</sup>, Xiangli Wang<sup>‡</sup>, Ting Gao<sup>§</sup>

<sup>†</sup>State Key Laboratory of Geological Processes and Mineral Resources, China University of Geosciences (Beijing), Beijing 100083, China.

<sup>‡</sup> Key Laboratory of Cenozoic Geology and Environment, Institute of Geology and Geophysics, Chinese Academy of Sciences, Beijing 100029, China

<sup>§</sup>State Key Laboratory of Environmental Geochemistry, Institute of Geochemistry, Chinese Academy of Sciences, Guiyang 550081, China

\* Corresponding author: Jian-Ming Zhu

Phone: 86-010-82322832;

E-mail: [jmzhu@cugb.edu.cn](mailto:jmzhu@cugb.edu.cn)

## Contents

1. Details of Equation (6) for calculating the error propagation of multi-standard addition.
2. Table S1 Instrumental operating parameters for Cd isotope measurement
3. Fig. S1 The  $\delta^{114/110}\text{Cd}$  values of mixed solutions (sample + standard) and calculated values for geological reference materials.
4. Fig. S2 The  $\delta^{114/110}\text{Cd}$  values of mixed solutions (sample + standard) and calculated values for biological reference materials.
5. Fig. S3 Comparison of the effects on removing matrix elements (Sn) in single column purification using traditional DS and DSSA methods
6. Fig. S4 The  $\delta^{114/110}\text{Cd}$  values of mixed solutions (sample + standard) and calculated values for ovine and pig organs.

**Text S1. Details of Equation (6) for calculating the error propagation of multi-standard addition.**

The  $\delta$  value of sample is calculated from equation (5), and the error propagation can be estimated by the following equation:

$$\sigma_{\delta spl - multi} = \sqrt{\left(\frac{\partial \delta spl - multi}{\partial \delta std1}\right)^2 \times \sigma_{\delta std1}^2 + \left(\frac{\partial \delta spl - multi}{\partial \delta std2}\right)^2 \times \sigma_{\delta std2}^2 + \left(\frac{\partial \delta spl - multi}{\partial \delta mix1}\right)^2 \times \sigma_{\delta mix1}^2 + \left(\frac{\partial \delta spl - multi}{\partial P std1}\right)^2 \times \sigma_{P std1}^2 + \left(\frac{\partial \delta spl - multi}{\partial P std2}\right)^2 \times \sigma_{P std2}^2 + \left(\frac{\partial \delta spl - multi}{\partial P mix1}\right)^2 \times \sigma_{P mix1}^2 + \left(\frac{\partial \delta spl - multi}{\partial P mix2}\right)^2 \times \sigma_{P mix2}^2}$$

Since the uncertainties contributed by  $\sigma_{P-std}$  and  $\sigma_{P-mix}$  account for less than one-thousandth of the total error, the terms containing  $\sigma_{P-std}$  and  $\sigma_{P-mix}$  can be negligible. Thus,

$$\sigma_{\delta spl - multi} = \sqrt{\left(\frac{\partial \delta spl - multi}{\partial \delta std1}\right)^2 \times \sigma_{\delta std1}^2 + \left(\frac{\partial \delta spl - multi}{\partial \delta std2}\right)^2 \times \sigma_{\delta std2}^2 + \left(\frac{\partial \delta spl - multi}{\partial \delta mix1}\right)^2 \times \sigma_{\delta mix1}^2 + \left(\frac{\partial \delta spl - multi}{\partial \delta mix2}\right)^2 \times \sigma_{\delta mix2}^2} \quad (6)$$

Each error term of equation 6 can be reduced by the following equations:

$$\frac{\partial \delta spl - multi}{\partial \delta std1} = 1 - \frac{P_{std1}^2 \times (\delta^{114/110} Cd_{std1} - \delta^{114/110} Cd_{mix1}) \times (\delta^{114/110} Cd_{std2} - \delta^{114/110} Cd_{mix2})}{(P_{std2} \times (P_{std1} - P_{mix1}) \times (\delta^{114/110} Cd_{std2} - \delta^{114/110} Cd_{mix2}) - P_{std1} \times (\delta^{114/110} Cd_{std1} - \delta^{114/110} Cd_{mix1})) \times (P_{std1} \times (\delta^{114/110} Cd_{std2} - \delta^{114/110} Cd_{mix2}) - P_{std1} \times (\delta^{114/110} Cd_{std1} - \delta^{114/110} Cd_{mix1}))} \quad (7)$$

$$\frac{\partial \delta spl - multi}{\partial \delta mix1} = \frac{P_{std1} \times (\delta^{114/110} Cd_{std2} - \delta^{114/110} Cd_{mix2})}{P_{std2} \times (P_{std1} - P_{mix1}) \times (\delta^{114/110} Cd_{std2} - \delta^{114/110} Cd_{mix2}) - P_{std1} \times (\delta^{114/110} Cd_{std1} - \delta^{114/110} Cd_{mix1})} + \frac{P_{std1}^2 \times (\delta^{114/110} Cd_{std1} - \delta^{114/110} Cd_{mix1}) \times (P_{std2} - P_{mix2}) \times (\delta^{114/110} Cd_{std2} - \delta^{114/110} Cd_{mix2})}{(P_{std2} \times (P_{std1} - P_{mix1}) \times (\delta^{114/110} Cd_{std2} - \delta^{114/110} Cd_{mix2}) - P_{std1} \times (\delta^{114/110} Cd_{std1} - \delta^{114/110} Cd_{mix1})) \times (P_{std1} \times (\delta^{114/110} Cd_{std2} - \delta^{114/110} Cd_{mix2}) - P_{std1} \times (\delta^{114/110} Cd_{std1} - \delta^{114/110} Cd_{mix1}))} \quad (8)$$

$$\begin{aligned}
& \frac{\partial_{\delta_{spl} - multi}}{\partial_{\delta_{std2}}} \\
&= \frac{P_{std1} \times P_{std2} \times (P_{std1} - P_{mix1}) \times (\delta^{114/110}Cd_{std1} - \delta^{114/100}Cd_{mix1})}{(P_{std2} \times (P_{std1} - P_{mix1}) \times (\delta^{114/110}Cd_{std2} - \delta^{114/110}Cd_{mix2}) - P_{std1} \times (\delta^{114/110}Cd_{std1} - \delta^{114/100}Cd_{mix1}))} \\
&- \\
& \frac{P_{std1} \times (\delta^{114/110}Cd_{std1} - \delta^{114/100}Cd_{mix1})}{P_{std2} \times (P_{std1} - P_{mix1}) \times (\delta^{114/110}Cd_{std2} - \delta^{114/110}Cd_{mix2}) - P_{std1} \times (\delta^{114/110}Cd_{std1} - \delta^{114/100}Cd_{mix1})}
\end{aligned}
\tag{9}$$

$$\begin{aligned}
& \frac{\partial_{\delta_{spl} - multi}}{\partial_{\delta_{mix2}}} \\
&= \frac{P_{std1} \times (\delta^{114/110}Cd_{std1} - \delta^{114/110}Cd_{mix1})}{P_{std2} \times (P_{std1} - P_{mix1}) \times (\delta^{114/110}Cd_{std2} - \delta^{114/110}Cd_{mix2}) - P_{std1} \times (\delta^{114/110}Cd_{std1} - \delta^{114/100}Cd_{mix1})} \\
&- \\
& \frac{P_{std1} \times P_{std2} \times (P_{std1} - P_{mix1}) \times (\delta^{114/110}Cd_{std1} - \delta^{114/110}Cd_{mix1}) \times (\delta^{114/110}Cd_{std2} - \delta^{114/110}Cd_{mix2})}{(P_{std2} \times (P_{std1} - P_{mix1}) \times (\delta^{114/110}Cd_{std2} - \delta^{114/110}Cd_{mix2}) - P_{std1} \times (\delta^{114/110}Cd_{std1} - \delta^{114/100}Cd_{mix1}))}
\end{aligned}
\tag{10}$$

**Table S1** Instrumental parameters for Cd isotope measurement.

| Parameters                | Setting for Neptune                                                                                                                                                                                                                                                  |
|---------------------------|----------------------------------------------------------------------------------------------------------------------------------------------------------------------------------------------------------------------------------------------------------------------|
| Cup configuration         | L4 ( <sup>107</sup> Ag), L3 ( <sup>108</sup> Cd), L2 ( <sup>109</sup> Ag), L1 ( <sup>110</sup> Cd), C ( <sup>111</sup> Cd), H1 ( <sup>112</sup> Cd, <sup>112</sup> Sn), H2 ( <sup>113</sup> Cd), H3 ( <sup>114</sup> Cd, <sup>114</sup> Sn), H4 ( <sup>117</sup> Sn) |
| Inlet system              |                                                                                                                                                                                                                                                                      |
| cool gas                  | 15 L min <sup>-1</sup>                                                                                                                                                                                                                                               |
| aux gas                   | 0.80-1.15 L min <sup>-1</sup>                                                                                                                                                                                                                                        |
| sample gas                | 0.92-1.20 L min <sup>-1</sup>                                                                                                                                                                                                                                        |
| RF power                  | 1250W                                                                                                                                                                                                                                                                |
| sample cone               | H type, Ni/Pt                                                                                                                                                                                                                                                        |
| skimmer cone              | X type, Ni/Pt                                                                                                                                                                                                                                                        |
| resolution mode           | low                                                                                                                                                                                                                                                                  |
| sample uptake             | 110 μL min <sup>-1</sup>                                                                                                                                                                                                                                             |
| Aridus II                 |                                                                                                                                                                                                                                                                      |
| spray chamber temperature | 110°C                                                                                                                                                                                                                                                                |
| desolvator temperature    | 160°C                                                                                                                                                                                                                                                                |
| Ar <sub>2</sub> sweep gas | 4.5-6 L min <sup>-1</sup>                                                                                                                                                                                                                                            |
| Nitrogen gas              | 1-6 mL min <sup>-1</sup>                                                                                                                                                                                                                                             |
| sensitivity               | 460 V ppm <sup>-1</sup> of <sup>112</sup> Cd                                                                                                                                                                                                                         |
| injecting concentration   | 5-10 μg L <sup>-1</sup>                                                                                                                                                                                                                                              |

|                  |                                                                                         |
|------------------|-----------------------------------------------------------------------------------------|
| number of cycles | 45 (3 blocks $\times$ 15 cycles) for 10 ppb; 60 (3 blocks $\times$ 20 cycles) for 5 ppb |
| Integration time | 4.194s                                                                                  |

---

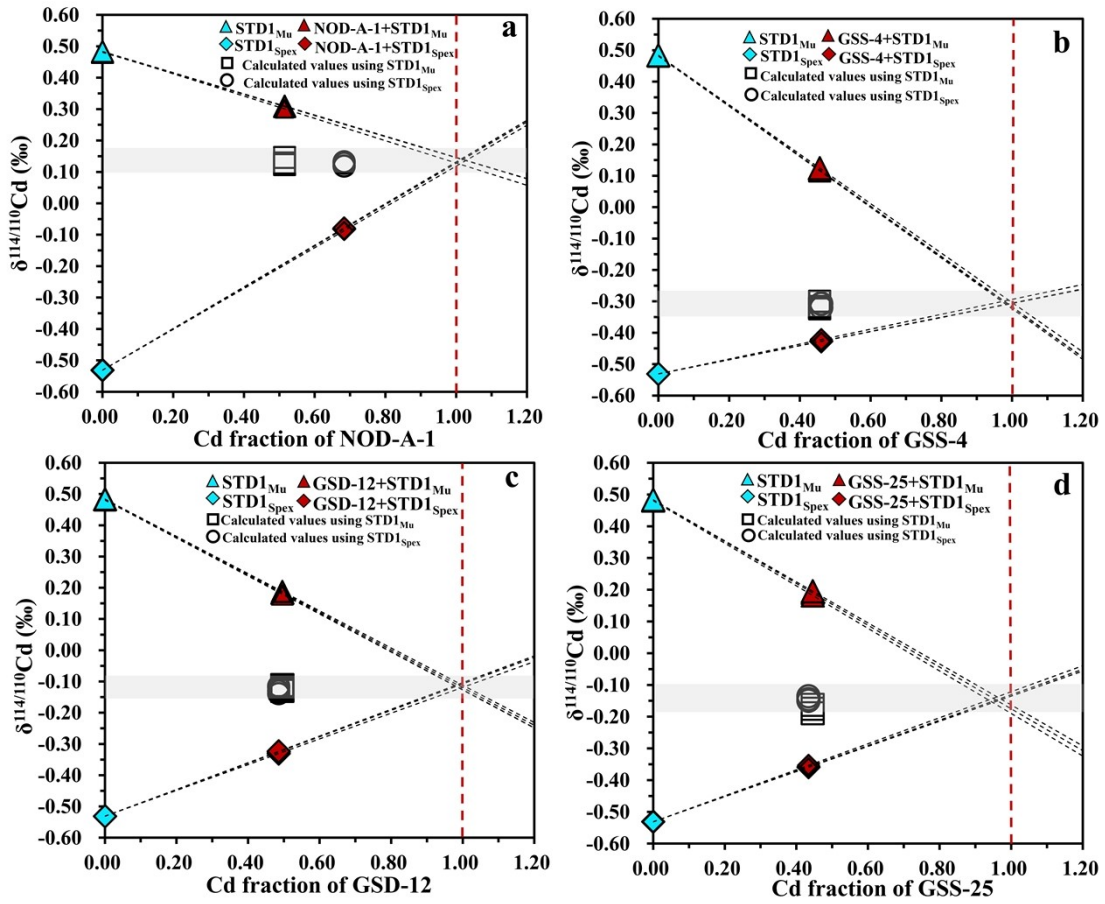

**Fig. S1** The  $\delta^{114/110}\text{Cd}$  values of mixed solutions (sample + standard) and calculated values for geological reference materials. The gray bar denotes 2SD of those values calculated by single-standard method; the red vertical line represents the pure sample (with no standard added).

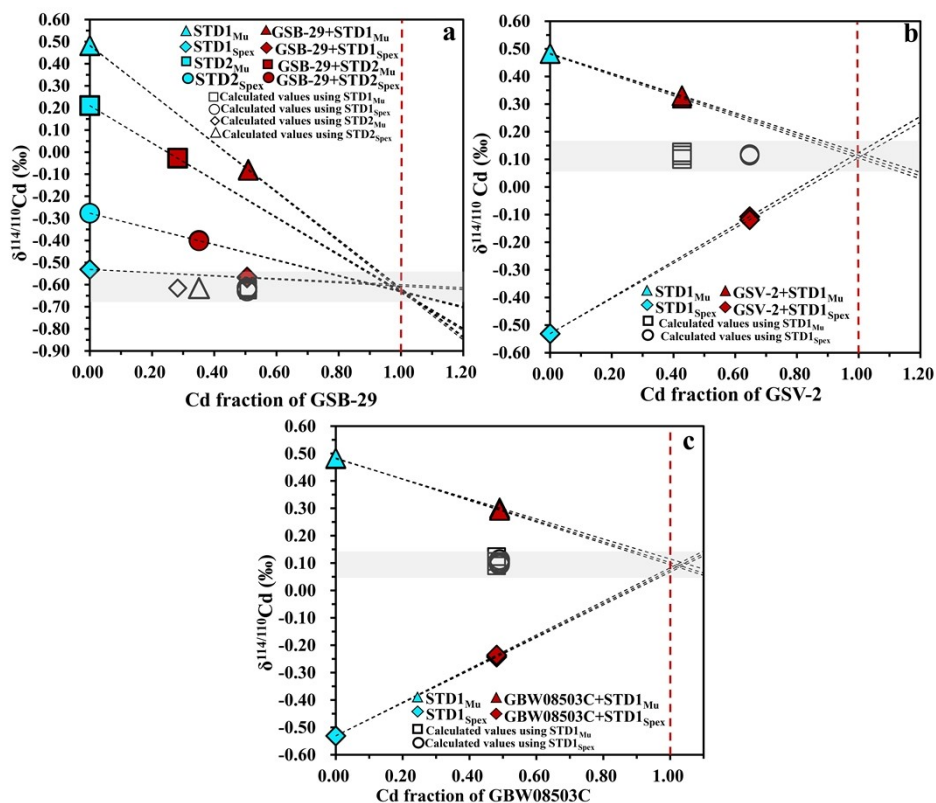

**Fig. S2** The  $\delta^{114/110}\text{Cd}$  values of mixed solutions (sample + standard) and calculated values for biological reference materials. The gray bar denotes 2SD of those values calculated by a single-standard; the red vertical line represents pure sample (with no standard added).

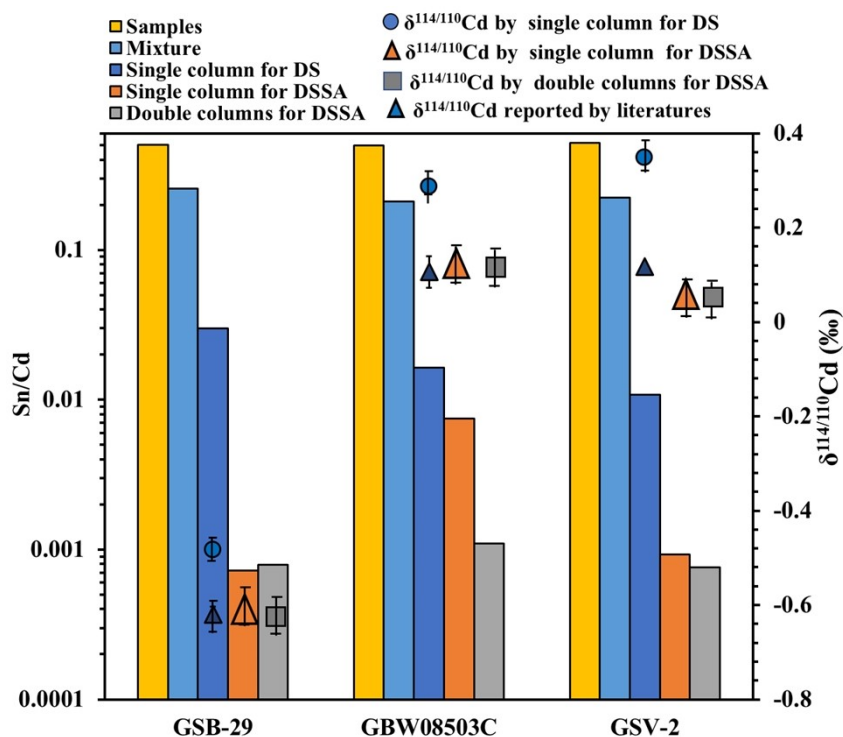

**Fig. S3** Comparison of the effects on removing matrix elements (Sn) in single column purification using traditional DS and DSSA methods.

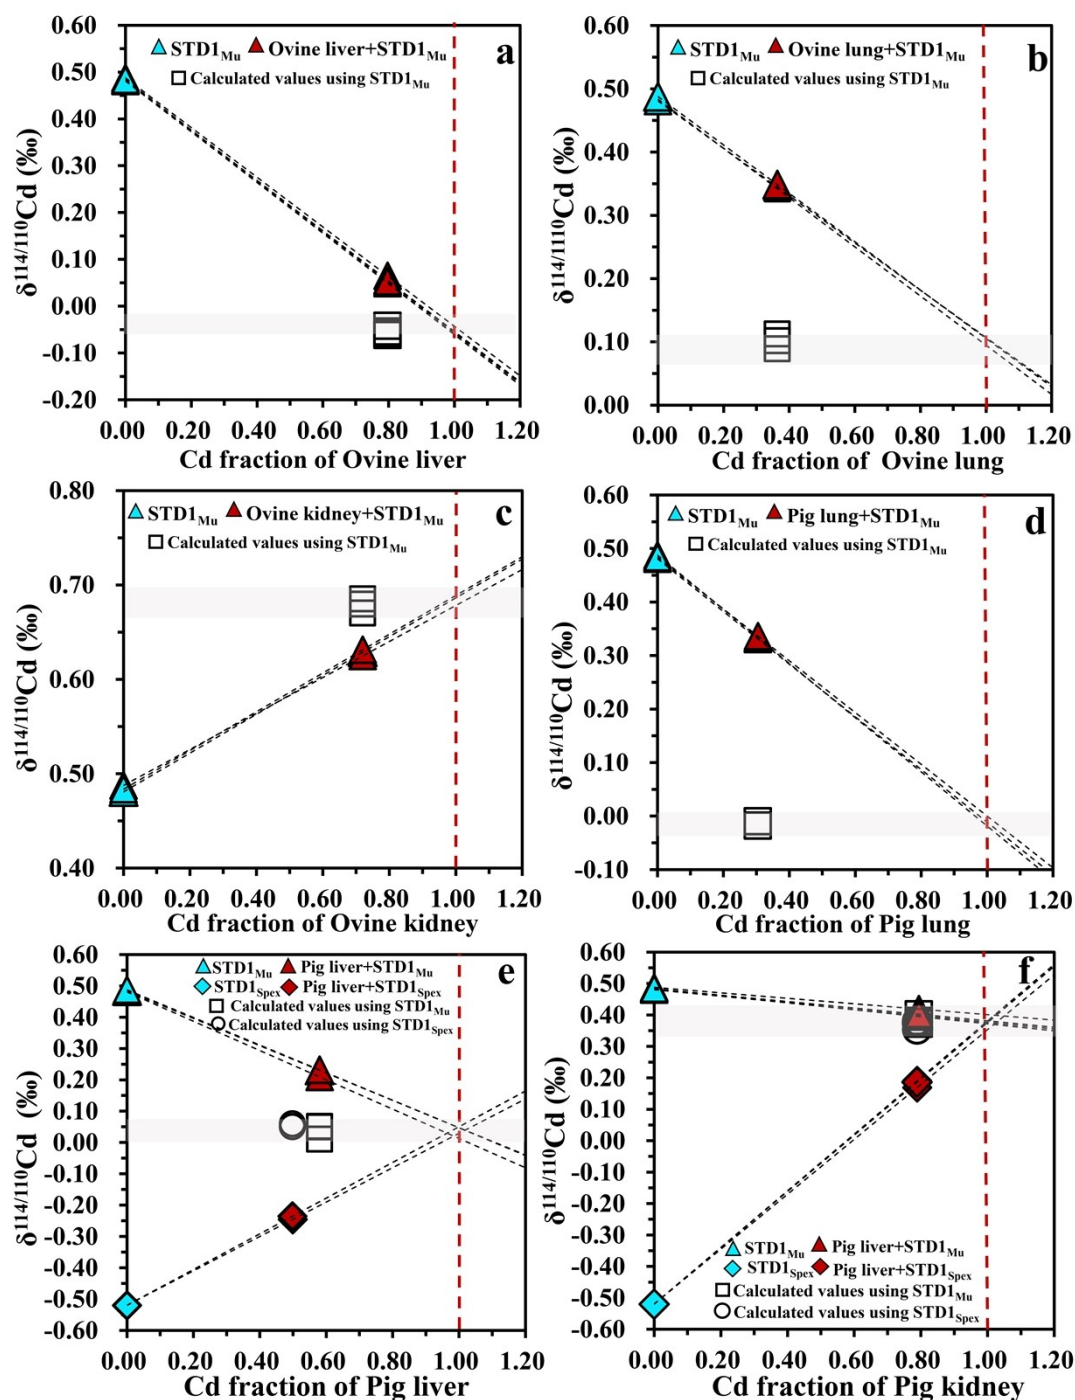

**Fig. S4** The  $\delta^{114/110}\text{Cd}$  values of mixed solutions (sample + standard) and calculated values for ovine and pig organs. The gray bar denotes 2SD of those values calculated by a single-standard; the red vertical line represents the 100% sample. (a) ovine liver; (b) ovine lung; (c) ovine kidney; (d) pig lung; (e) pig liver; (f) pig kidney.
