# Supplementary material for: High-precision measurement of Cd isotopes in ultra-trace Cd samples using double spike-standard addition MC-ICP-MS
Source: Royal Society of Chemistry journal article supplement (doi:10.1039/d3ja00047h), 2023-01-01
Supplement: d3ja00047h2.xlsx [file d3ja00047h2.xlsx]

## Sheet: Table S2
Table S2 The detalied values of δ114/110Cd for Single- standard and Multi- standard
1.BCR-2		δ114/110Cd for Single- standard	Error propagation	2SD		δ114/110Cd for Multi- standard	Error propagation	2SD
STD1Spex	BCR-2 (48.03%)	-0.0224183	0.0341857			0.013313	0.11	48.03% for STD1Spex and 16.63% for STD1Mu
	BCR-2 (48.03%)	-0.00995001	0.0341857			0.007542	0.11
	BCR-2 (48.03%)	-0.00482483	0.0341857			0.010477	0.11
Single Std: STD1Spex	Average	-0.0123977	0.0341857	0.0386803		0.008528	0.11
STD1Mu	BCR-2 (16.63%)	0.00332341	0.117352			0.024997	0.11
	BCR-2(16.63%)	0.006712	0.117352			0.00485	0.11
	BCR-2(16.63%)	0.0201576	0.117352			0.02032	0.11
Single Std: STD1Mu	Average	0.01	0.117352	0.0386803		0.013041	0.11
STD1Mu	BCR-2(17.26%)	-0.00952989	0.112982			0.008306	0.11	0.112077
	BCR-2(17.26%)	-0.0200622	0.112982			Multi-standard	Average±2SD	0.012±0.112
Single Std: STD1Mu	Average	-0.015	0.112982	0.11396		δ114/110Cd for Multi- standard	Error propagation	2SD
STD1Spex	BCR-2(15.88%)	0.00352983	0.12008			0.009227	0.193352	15.58% for STD1Spex and 16.63% for STD1Mu
	BCR-2(15.88%)	0.0255963	0.12008			0.012586	0.193352
	BCR-2(15.88%)	0.0226376	0.12008			0.015566	0.193352
Single Std: STD1Spex	Average	0.017	0.12008	0.122446		0.015308	0.193352
						0.01315	0.193352
						0.001328	0.193352
						0.014948	0.193352
						0.022308	0.193352
		Average	Error propagation	2SD		0.01708	0.193352	0.193698
Single and multi- standard	Total average	-0.0123977	0.0341857	0.0386803		Multi-standard	Average±2SD	0.014±0.194
2.BHVO-2		δ114/110Cd for Single- standard	Error propagation	2SD		δ114/110Cd for Multi- standard	Error propagation	2SD
STD1Mu	BHVO-2(46.67%)	0.000154469	0.0289127			0.00813252	0.0238978	Multi-standard (48.05% of fspl for STD1Spex and 46.67% of fspl for STD1Mu)
	BHVO-2(46.67%)	0.0155852	0.0289127			0.0114288	0.0238978
	BHVO-2(46.67%)	0.00872394	0.0289127			0.0165231	0.0238978
	BHVO-2(46.67%)	0.00242006	0.0289127			0.00699106	0.0238978
Single Std: STD1Mu	Average	0.007	0.0289127	0.0320658		0.0134556	0.0238978
STD1Spex	BHVO-2 (48.05%)	0.0357212	0.0449601			0.0167476	0.0238978
	BHVO-2 (48.05%)	0.027398	0.0449601			0.0218964	0.0238978
	BHVO-2 (48.05%)	0.0433523	0.0449601			0.0123155	0.0238978
	BHVO-2 (48.05%)	0.039009	0.0449601			0.0234435	0.0238978
Single Std: STD1Spex	Average	0.036	0.0449601	0.0469424		0.0267141	0.0238978
STD1Mu	BHVO-2(14.61%)	0.048138	0.135042			0.0318275	0.0238978
	BHVO-2(14.61%)	0.0355999	0.135042			0.0223106	0.0238978
	BHVO-2(14.61%)	0.0224938	0.135042			0.0119864	0.0238978
Single Std: STD1Mu	Average	0.0354106	0.135042	0.137455		0.0152796	0.0238978
STD1Spex (14.64%)	BHVO-2 (14.64%)	0.0527179	0.130901			0.0204306	0.0238978
	BHVO-2 (14.64%)	0.0397379	0.130901			0.0108459	0.0238978	0.0276732
	BHVO-2 (14.64%)	0.0369947	0.130901			Multi-standard	Average±2SD	0.017±0.028
Single Std: STD1Spex	Average	0.0431502	0.130901	0.131974		δ114/110Cd for Multi- standard	Error propagation	2SD
						0.022907	0.198289	Multi-standard (14.64% of fspl for STD1Spex and 14.61% of fsplfor STD1Mu)
						0.026383	0.198289
						0.012015	0.198289
						0.022065	0.198289
						0.020805	0.198289
						0.022531	0.198289
						0.027234	0.198289
						0.031651	0.198289
		Average	Error propagation	2SD		0.025909	0.198289	0.198588
Single and multi- standard	Total average	0.0184455	0.0325902	0.0456517		Multi-standard	Average±2SD	0.024±0.006
3.NOD-A-1		δ114/110Cd for Single- standard	Error propagation	2SD		δ114/110Cd for Multi- standard	Error propagation	2SD
STD1Mu	NOD-A-1 (51.47%)	0.146044	0.0291702			0.139447	0.0193682
	NOD-A-1 (51.47%)	0.123043	0.0291702			0.145494	0.0193682
	NOD-A-1 (51.47%)	0.12844	0.0291702			0.138782	0.0193682
Single Std: STD1Mu	Average	0.133	0.0291702	0.0378108		0.127862	0.0193682
STD1Spex	NOD-A-1(55.12%)	0.11848	0.0197119			0.123039	0.0193682
	NOD-A-1(55.12%)	0.127437	0.0197119			0.126257	0.0193682
	NOD-A-1(55.12%)	0.131918	0.0197119			0.138814	0.0193682
Single Std: STD1Spex	Average	0.126	0.0197119	0.0239957		0.134085	0.0193682
		Average	Error propagation	2SD		0.13724	0.0193682	0.0243264
Single and multi- standard	Total average	0.132425	0.0227501	0.0282576		Multi-standard	Average±2SD	0.135±0.024
4.MS-E1		δ114/110Cd for Single- standard	Error propagation	2SD		δ114/110Cd for Multi- standard	Error propagation	2SD
STD1Mu	MS-E1(39.65%)	-0.172332	0.0473854			-0.14622	0.0302699
	MS-E1(39.65%)	-0.174656	0.0473854			-0.152328	0.0302699
	MS-E1(39.65%)	-0.182062	0.0473854			-0.162104	0.0302699
	MS-E1(39.65%)	-0.173697	0.0473854			-0.164449	0.0302699
Single Std: STD1Mu	Average	-0.176	0.0473854	0.0481795		-0.152999	0.0302699
STD1Spex	MS-E1(39.32%)	-0.130923	0.0462048			-0.15908	0.0302699
	MS-E1(39.32%)	-0.149732	0.0462048			-0.168811	0.0302699
	MS-E1(39.32%)	-0.122066	0.0462048			-0.171144	0.0302699
	MS-E1(39.32%)	-0.139921	0.0462048			-0.15192	0.0302699
Single Std: STD1Spex	Average	-0.136	0.0462048	0.0539562		-0.157988	0.0302699
						-0.167698	0.0302699
						-0.170025	0.0302699
						-0.156792	0.0302699
						-0.162826	0.0302699
						-0.172476	0.0302699
		Average	Error propagation	2SD		-0.174788	0.0302699	0.034717
Single and multi- standard	Total average	-0.159877	0.0412867	0.0507023		Multi-standard	Average±2SD	-0.162±0.035
5.GSS-4		δ114/110Cd for Single- standard	Error propagation	2SD		δ114/110Cd for Multi- standard	Error propagation	2SD
STD1Mu	GSS-4 (45.60%)	-0.316938	0.0357865			-0.309456	0.0267278
	GSS-4 (45.60%)	-0.321628	0.0357865			-0.31958	0.0267278
	GSS-4 (45.60%)	-0.323958	0.0357865			-0.31854	0.0267278
	GSS-4 (45.60%)	-0.300423	0.0357865			-0.304115	0.0267278
Single Std: STD1Mu	Average	-0.316	0.0357865	0.0436132
STD1Spex	GSS-4 (45.60%)	-0.320175	0.051631			-0.314325	0.0267278
	GSS-4 (45.60%)	-0.307268	0.051631			-0.313276	0.0267278
	GSS-4 (45.60%)	-0.319928	0.051631			-0.306868	0.0267278
	GSS-4 (45.60%)	-0.308451	0.051631			-0.31698	0.0267278
Single Std: STD1Spex	Average	-0.314	0.051631	0.0525249		-0.315941	0.0267278
						-0.308269	0.0267278
						-0.318331	0.0267278
		Average	Error propagation	2SD		-0.317297	0.0267278	0.0286619
Single and multi- standard	Total average	-0.314087	0.0380484	0.0401909		Multi-standard	Average±2SD	-0.314±0.029
6.GSD-12		δ114/110Cd for Single- standard	Error propagation	2SD		δ114/110Cd for Multi- standard	Error propagation	2SD
STD1Mu	GSD-12(49.58%)	-0.119792	0.030857			-0.122538	0.026751
	GSD-12(49.58%)	-0.13013	0.030857			-0.11759	0.026751
	GSD-12(49.58%)	-0.112063	0.030857			-0.120637	0.026751
	GSD-12(49.58%)	-0.126417	0.030857			-0.123324	0.026751
Single Std: STD1Mu	Average	-0.122	0.030857	0.0357044		-0.129434	0.026751
STD1Spex	GSD-12(48.57%)	-0.119359	0.0418961			-0.124516	0.026751
	GSD-12(48.57%)	-0.130745	0.0418961			-0.127545	0.026751
	GSD-12(48.57%)	-0.11537	0.0418961			-0.130216	0.026751
	GSD-12(48.57%)	-0.139004	0.0418961			-0.120155	0.026751
Single Std: STD1Spex	Average	-0.126	0.0418961	0.0481189		-0.115198	0.026751
						-0.11825	0.026751
						-0.120943	0.026751
						-0.126148	0.026751
						-0.121216	0.026751
						-0.124253	0.026751
		Average	Error propagation	2SD		-0.126932	0.026751	0.0280998
Single and multi- standard	Total average	-0.123407	0.033168	0.0353349		Multi-standard	Average±2SD	-0.123±0.028
7.GSS-25		δ114/110Cd for Single- standard	Error propagation	2SD		δ114/110Cd for Multi- standard	Error propagation	2SD
STD1Mu	GSS-25(44.57%)	-0.17533	0.0424798			-0.151918	0.0323606
	GSS-25(44.57%)	-0.189766	0.0424798			-0.156299	0.0323606
	GSS-25(44.57%)	-0.163052	0.0424798			-0.160337	0.0323606
Single Std: STD1Mu	Average	-0.176±0.027	0.0424798	0.050197		-0.146182	0.0323606
STD1Spex	GSS-25 (43.39%)	-0.149974	0.0508404			-0.150592	0.0323606
	GSS-25 (43.39%)	-0.13619	0.0508404			-0.154656	0.0323606
	GSS-25 (43.39%)	-0.145532	0.0508404			-0.154731	0.0323606
Single Std: STD1Spex	Average	-0.144±0.014	0.0508404	0.0527518		-0.159098	0.0323606
		Average	Error propagation	2SD		-0.163122	0.0323606	0.0340132
Single and multi- standard	Total average	-0.157119	0.0418936	0.0571088		Multi-standard	Average±2SD	-0.155±0.034
8.GSH-1		δ114/110Cd for Single- standard	Error propagation	2SD		δ114/110Cd for Multi- standard	Error propagation	2SD
STD1Mu	GSH-1(37.49%)	-0.338793	0.0412631			-0.305966	0.0414321
	GSH-1(37.49%)	-0.319935	0.0412631			-0.30832	0.0414321
	GSH-1(37.49%)	-0.322507	0.0412631			-0.306239	0.0414321
	GSH-1(37.49%)	-0.323205	0.0412631			-0.30908	0.0414321
Single Std: STD1Mu	Average	-0.326	0.0412631	0.0446825		-0.311207	0.0414321
STD1Spex	GSH-1 (37.49%)	-0.31854	0.0574312			-0.313518	0.0414321
	GSH-1 (37.49%)	-0.316765	0.0574312			-0.311475	0.0414321
	GSH-1 (37.49%)	-0.309956	0.0574312			-0.314264	0.0414321
	GSH-1 (37.49%)	-0.303171	0.0574312			-0.318037	0.0414321
Single Std: STD1Spex	Average	-0.312	0.0574312	0.0591193		-0.320291	0.0414321
						-0.318299	0.0414321
						-0.321019	0.0414321
						-0.316597	0.0414321
						-0.318864	0.0414321
						-0.316861	0.0414321
		Average	Error propagation	2SD		-0.319596	0.0414321	0.0426601
Single and multi- standard	Total average	-0.315938	0.0467088	0.0490126		Multi-standard	Average±2SD	-0.314±0.043
9.GSV-2		δ114/110Cd for Single- standard	Error propagation	2SD		δ114/110Cd for Multi- standard	Error propagation	2SD
STD1Mu	GSV-2(42.75%)	0.114298	0.0391261			0.11771	0.0250983
	GSV-2(42.75%)	0.100983	0.0391261			0.113492	0.0250983
	GSV-2(42.75%)	0.124462	0.0391261			0.124239	0.0250983
	GSV-2(42.75%)	0.125128	0.0391261			0.124627	0.0250983
Single Std: STD1Mu	Average	0.116	0.0391261	0.0451856		0.118103	0.0250983
STD1Spex	GSV-2(42.75%)	0.117512	0.0269746			0.113886	0.0250983
	GSV-2(42.75%)	0.118622	0.0269746			0.124628	0.0250983
	GSV-2(42.75%)	0.117781	0.0269746			0.125016	0.0250983
	GSV-2(42.75%)	0.11314	0.0269746			0.117817	0.0250983
Single Std: STD1Spex	Average	0.117	0.0269746	0.0324202		0.1136	0.0250983
						0.124345	0.0250983
						0.124733	0.0250983
						0.111498	0.0250983
						0.107249	0.0250983
						0.118075	0.0250983
		Average	Error propagation	2SD		0.118466	0.0250983	0.0274858
Single and multi- standard	Total average	0.117892	0.0303997	0.0328636		Multi-standard	Average±2SD	0.119±0.027
10.GBW08503C		δ114/110Cd for Single- standard	Error propagation	2SD		δ114/110Cd for Multi- standard	Error propagation	2SD
STD1Mu	GBW08503C (49.01%)	0.101795	0.030581			0.0882624	0.0261101
	GBW08504C (49.01%)	0.111982	0.030581			0.0984805	0.0261101
	GBW08505C (49.01%)	0.0941739	0.030581			0.0834323	0.0261101
Single Std: STD1Mu	Average	0.103	0.030581	0.0354192		0.0910663	0.0261101
STD1Spex	GBW08503C(49.01%)	0.090072	0.0433141			0.101257	0.0261101
	GBW08504C(49.01%)	0.123074	0.0433141			0.0862484	0.0261101
	GBW08505C(49.01%)	0.105706	0.0433141			0.0856902	0.0261101
Single Std: STD1Spex	Average	0.106	0.0433141	0.0464463		0.0957038	0.0261101
		Average	Error propagation	2SD		0.0809549	0.0261101	0.0296332
Single and multi- standard	Total average	0.0958599	0.033335	0.0418612		Multi-standard	Average±2SD	0.090±0.030
11.GSB-29		δ114/110Cd for Single- standard	Error propagation	2SD		δ114/110Cd for Multi- standard	Error propagation	2SD
STD1Mu	GSB-29 (50.95%)	-0.620179	0.0250258			-0.606191	0.000758671
	GSB-29 (50.95%)	-0.615581	0.0250258			-0.606734	0.000758671
	GSB-29 (50.95%)	-0.627621	0.0250258			-0.605633	0.000758671
Single Std: STD1Mu	Average	-0.612±0.012	0.0250258	0.02782		-0.605131	0.000758671
STD1Spex	GSB-29 (50.95%)	-0.614227	0.0375018			-0.605667	0.000758671
	GSB-29 (50.95%)	-0.615241	0.0375018			-0.604583	0.000758671
	GSB-29 (50.95%)	-0.629404	0.0375018			-0.598505	0.000758671
Single Std: STD1Spex	Average	-0.620±0.017	0.0375018	0.0411626		-0.598989	0.000758671
STD2Mu	GSB-29 (50.95%)	-0.580341	0.037093			-0.598009	0.000758671
	GSB-29 (50.95%)	-0.579341	0.037093			-0.604155	0.000758671
	GSB-29 (50.95%)	-0.599341	0.037093			-0.604822	0.000758671
Single Std: STD2Mu	Average	-0.580±0.013	0.037093	0.0434038		-0.606095	0.000758671
STD2Spex	GSB-29 (50.95%)	-0.616	0.0506644			-0.603101	0.000758671
	GSB-29 (50.95%)	-0.606	0.0506644			-0.603758	0.000758671
	GSB-29 (50.95%)	-0.612	0.0506644			-0.60501	0.000758671
Single Std: STD2Spex	Average	-0.616±0.015	0.0506644	0.0516547		-0.596525	0.000758671
						-0.597117	0.000758671
						-0.598246	0.000758671
						-0.695391	0.000758671
						-0.65633	0.000758671
						-0.61762	0.000758671
						-0.722331	0.000758671
						-0.689318	0.000758671
						-0.632573	0.000758671
						-0.660979	0.000758671
						-0.623918	0.000758671
						-0.587743	0.000758671
						-0.601325	0.000758671
						-0.601452	0.000758671
						-0.601683	0.000758671
						-0.600152	0.000758671
						-0.600277	0.000758671
						-0.600502	0.000758671
						-0.592951	0.000758671
						-0.59306	0.000758671
						-0.593258	0.000758671
						-0.632114	0.000758671
						-0.631373	0.000758671
						-0.630041	0.000758671
						-0.635644	0.000758671
						-0.634893	0.000758671
						-0.633544	0.000758671
						-0.628513	0.000758671
						-0.627782	0.000758671
						-0.626468	0.000758671
						-0.621711	0.000758671
						-0.620873	0.000758671
						-0.61937	0.000758671
						-0.626647	0.000758671
						-0.625793	0.000758671
						-0.624259	0.000758671
						-0.6362	0.000758671
						-0.635312	0.000758671
		Average	Error propagation	2SD		-0.633719	0.000758671	0.0529392
Single and multi- standard	Total average	-0.617556	0.0302087	0.0585658		Multi-standard	Average±2SD	-0.619±0.053
